# Supplementary material for: Comportamenti di cloni di Prosecco tondo e di Prosecco lungo allevati secondo tre forme di allevamento nella zona del prosecco DOCG Conegliano-Valdobbiadene.
Source: Oxford University Press journal article supplement (doi:10.2337/dc10-1616), 2013-09-01

## SUPPLEMENTARY DATA

### ***Detailed Description of Markov Simulation Modules***

For retinopathy, we used the original DCCT prediction models for background diabetic retinopathy, macular edema, and proliferative retinopathy that relate glycated hemoglobin and duration of diabetes with the cumulative probability of developing these intermediate complications (courtesy Richard Eastman).<sup>1,2</sup> For the transition from intermediate complications to blindness, we used annual probabilities from natural history studies of diabetic eye disease.<sup>3,4</sup> For nephropathy, we again used the original DCCT prediction models microalbuminuria and gross proteinuria.<sup>1,2</sup> For the transition from gross proteinuria to end-stage renal disease we used probabilities from a natural history study by Humphrey and colleagues.<sup>5</sup> For neuropathy, we used the DCCT prediction model for neuropathy. Once neuropathy developed, patients were subject to the risks of developing foot ulcers<sup>6,7</sup> and amputation.<sup>8</sup> We assumed that the age at which risk of microvascular complications would begin was 17 years of age based on observations from epidemiological studies.<sup>9</sup>

For cardiovascular complications, there are no established prediction models for patients with type 1 diabetes in the literature. In lieu of such models, we employed prediction models for type 2 diabetes patients from the United Kingdom Prospective Diabetes Study for ischemic heart disease, myocardial infarction, congestive heart failure, and stroke.<sup>10</sup>

Hypoglycemic events are a major complication inherent to the treatment of type 1 diabetes.<sup>11</sup> Recent large studies have estimated the risk of severe hypoglycemic events (as defined in <sup>12</sup>) at 1.1 episodes per patient year in youth with insulin-treated type 1 diabetes.<sup>13</sup> In the hundreds of cases of NDM reported over the last five years after successful conversion to sulfonylureas, there is a consistent major decrease in the incidence of severe hypoglycemia, with only a single episode reported in the literature. We thus assume a rate of 1 episode per 1000 patient years, or 0.001 per patient year.

For diabetic ketoacidosis (DKA), we make a similar assumption that the risk of DKA is extremely low after successful conversion to sulfonylureas. While numerous patients before conversion have been reported to have experienced DKA (similar to type 1 diabetes patients) not a single case has yet been reported after switching off of insulin. We thus assume a rate of 0.01 per patient year based on the hypothetical concern that DKA could occur if a patient stopped all treatment. In contrast, DKA is a major cost of type 1 diabetes that has been suggested to occur 2-10 times per 100 patient-years. In those who are not screened or do not have a treatable mutation we assume a risk based on a recent large prospective study documenting 5.1 episodes of DKA per 100 patient-years.<sup>14</sup>

For mortality, first event mortality and diabetes mortality were based again on UKPDS models.<sup>10</sup> Background mortality rates were derived from National Vital Statistics Life Tables. As in prior diabetes modeling exercises, we subtracted the cardiovascular death rates from the overall death rates for the non-diabetes population (based on risk factor data from NHANES<sup>15</sup> and Framingham risk equations<sup>16</sup>) in order to obtain background death rates for the non-diabetes population. These mortality rates were then increased by 2.75 reflecting the increased risk of background mortality of diabetes patients compared to non-diabetes patients.<sup>17-19</sup>

# Supplementary References

1. Eastman RC, Javitt JC, Herman WH, et al. Model of complications of NIDDM: II. Analysis of the health benefits and cost-effectiveness of treating NIDDM with the goal of normoglycemia. *Diabetes Care* 1997;20(5):735-44.
2. Eastman RC, Javitt JC, Herman WH, et al. Model of complications of NIDDM: I. Model construction and assumptions. *Diabetes Care* 1997;20(5):725-34.
3. Javitt JC, Aiello LP, Chiang Y, Ferris FL, Canner JK, Greenfield S. Preventive eye care in people with diabetes is cost-saving to the federal government. *Diabetes Care* 1994;17(8):909-17.
4. Vijan S, Hofer TP, Hayward RA. Cost-utility analysis of screening intervals for diabetic retinopathy in patients with type 2 diabetes mellitus. *Journal of the American Medical Association* 2000;283(7):889-96.
5. Humphrey LL, Ballard DJ, Frohnert PP, Chu CP, O'Fallon WM, Palumbo PJ. Chronic renal failure in non-insulin-dependent diabetes mellitus. A population-based study in Rochester, Minnesota. *Ann Intern Med* 1989;111(10):788-96.
6. Young MJ, Breddy JL, Veves A, Boulton AJM. The prediction of diabetic neuropathic foot ulceration using vibration perception thresholds. *Diabetes Care* 1994;17(6):557-60.
7. Gregg EW, Sorlie P, Paulose-Ram R, et al. Prevalence of lower-extremity disease in the U.S. adult population  $\geq 40$  years of age with and without diabetes. *Diabetes Care* 2004;27(7):1591-7.
8. Peters EJG, Lavery LA. Effectiveness of the diabetic foot risk classification system of the international working group on the diabetic foot. *Diabetes Care* 2001;24(8):1442-7.
9. Burger W, Hovener G, Dusterhus R, Hartmann R, Weber B. Prevalence and development of retinopathy in children and adolescents with type 1 (insulin-dependent) diabetes mellitus. A longitudinal study. *Diabetologia* 1986;29(1):17-22.
10. Clarke PM, Gray AM, Briggs A, et al. A model to estimate the lifetime health outcomes of patients with type 2 diabetes: the United Kingdom Prospective Diabetes Study (UKPDS) Outcomes Model (UKPDS no. 68). *Diabetologia* 2004;47(10):1747-59.
11. Cryer PE. The barrier of hypoglycemia in diabetes. *Diabetes* 2008;57(12):3169-76.
12. Clarke W, Jones T, Rewers A, Dunger D, Klingensmith GJ. Assessment and management of hypoglycemia in children and adolescents with diabetes. *Pediatr Diabetes* 2009;10 Suppl 12:134-45.
13. Group UHS. Risk of hypoglycaemia in types 1 and 2 diabetes: effects of treatment modalities and their duration. *Diabetologia* 2007;50(6):1140-7.
14. Karges B, Kapellen T, Neu A, et al. Long-acting insulin analogs and the risk of diabetic ketoacidosis in children and adolescents with type 1 diabetes A prospective study of 10,682 patients from 271 institutions. *Diabetes Care* 2010.
15. Compressed Mortality File 1999-2005. (Accessed October 10, 2008, at <http://wonder.cdc.gov/cmfmf-icd10.html> )
16. Wilson PWF, D'Agostino RB, Levy D, Belanger AM, Silbershatz H, Kannel WB. Prediction of coronary heart disease using risk factor categories. *Circulation* 1998;97:1837-47.
17. Patterson CC, Dahlquist G, Harjutsalo V, et al. Early mortality in EURODIAB population-based cohorts of type 1 diabetes diagnosed in childhood since 1989. *Diabetologia* 2007;50(12):2439-42.
18. Skrivarhaug T, Bangstad HJ, Stene LC, Sandvik L, Hanssen KF, Joner G. Long-term mortality in a nationwide cohort of childhood-onset type 1 diabetic patients in Norway. *Diabetologia* 2006;49(2):298-305.
19. Dahlquist G, Kallen B. Mortality in childhood-onset type 1 diabetes: a population-based study. *Diabetes Care* 2005;28(10):2384-7.

## SUPPLEMENTARY DATA

20. Pearson ER, Flechtner I, Njolstad PR, et al. Switching from insulin to oral sulfonylureas in patients with diabetes due to Kir6.2 mutations. *N Engl J Med* 2006;355(5):467-77.
21. Stoy J, Greeley SA, Paz VP, et al. Diagnosis and treatment of neonatal diabetes: a United States experience. *Pediatr Diabetes* 2008;9(5):450-9.
22. Wadwa RP, Kinney GL, Maahs DM, et al. Awareness and treatment of dyslipidemia in young adults with type 1 diabetes. *Diabetes Care* 2005;28(5):1051-6.
23. Eastman RC, Javitt JC, Herman WH, et al. Model of complications of NIDDM. I. Model construction and assumptions. *Diabetes Care* 1997;20(5):725-34.
24. Early Treatment Diabetic Retinopathy Study Research Group. Early photocoagulation for diabetic retinopathy: ETDRS Report Number 9. *Ophthalmology* 1991;98:766-85.
25. Adler AI, Stevens RJ, Manley SE, et al. Development and progression of nephropathy in type 2 diabetes: The United Kingdom Prospective Diabetes Study (UKPDS 64). *Kidney Int* 2003;63:225-32.
26. Karges B, Kapellen T, Neu A, et al. Long-acting insulin analogs and the risk of diabetic ketoacidosis in children and adolescents with type 1 diabetes: a prospective study of 10,682 patients from 271 institutions. *Diabetes Care* 2010;33(5):1031-3.
27. Rafiq M, Flanagan SE, Patch AM, et al. Effective treatment with oral sulfonylureas in patients with diabetes due to sulfonylurea receptor 1 (SUR1) mutations. *Diabetes Care* 2008;31(2):204-9.
28. Rith-Najarian SJ, Stolusky T, Gohdes DM. Identifying diabetic patients at high risk for lower-extremity amputation in a primary health care setting. *Diabetes Care* 1992;15(10):1386-9.
29. Selvin E, Erlinger TP. Prevalence of and risk factors for peripheral arterial disease in the United States: results from the National Health and Nutrition Examination Survey, 1999-2000. *Circulation* 2004;110(6):738-43.
30. Go AS, Hylek EM, Phillips KA, et al. Prevalence of diagnosed atrial fibrillation in adults: national implications for rhythm management and stroke prevention: the AnTicoagulation and Risk Factors in Atrial Fibrillation (ATRIA) Study. *Journal of the American Medical Association* 2001;285(18):2370-5.
31. The Diabetes Control and Complications Trial Research Group. The Effect Of Intensive Treatment Of Diabetes On The Development And Progression Of Long-Term Complications In Insulin-Dependent Diabetes Mellitus. *N Engl J Med* 1993;329(14):977-86.
32. The Diabetes Control and Complications Trial Research Group. Retinopathy and nephropathy in patients with type 1 diabetes four years after a trial of intensive therapy. *N Engl J Med* 2000;342(6):381-9.
33. Weintrob N, Benzaquen H, Galatzer A, et al. Comparison of continuous subcutaneous insulin infusion and multiple daily injection regimens in children with type 1 diabetes: a randomized open crossover trial. *Pediatrics* 2003;112(3 Pt 1):559-64.
34. O'Brien JA, Patrick AR, Caro J. Estimates of direct medical costs for microvascular and macrovascular complications resulting from type 2 diabetes mellitus in the United States in 2000. *Clin Ther* 2003;25(3):1017-38.
35. Singh N, Armstrong DG, Lipsky BA. Preventing foot ulcers in patients with diabetes. *Journal of the American Medical Association* 2005;293(2):217-28.
36. Ellis D, Naar-King S, Templin T, et al. Multisystemic therapy for adolescents with poorly controlled type 1 diabetes: reduced diabetic ketoacidosis admissions and related costs over 24 months. *Diabetes Care* 2008;31(9):1746-7.
37. Bullano MF, Al-Zakwani IS, Fisher MD, Menditto L, Willey VJ. Differences in hypoglycemia event rates and associated cost-consequence in patients initiated on long-acting and intermediate-acting insulin products. *Curr Med Res Opin* 2005;21(2):291-8.

## SUPPLEMENTARY DATA

38. Dasbach EJ, Fryback DG, Thornbury JR. Health utility preference differences. *Med Decis Making* 1992;12(4):351.
39. The Diabetes Control and Complications Trial Research Group. Lifetime benefits and costs of intensive therapy as practiced in the Diabetes Control and Complications Trial. *JAMA* 1996;276:1409-15.
40. Redekop WK, Stolk EA, Kok E, Lovas K, Kalo Z, Busschbach JJ. Diabetic foot ulcers and amputations: estimates of health utility for use in cost-effectiveness analyses of new treatments. *Diabetes Medicine* 2004;30(6):549-56.
41. Tennvall GR, Apelqvist J. Prevention of diabetes-related foot ulcers and amputations: a cost-utility analysis based on Markov model simulations. *Diabetologia* 2001;44:2077-87.
42. The CDC Diabetes Cost-effectiveness Group. Cost-effectiveness of intensive glycemic control, intensified hypertension control, and serum cholesterol level reduction, for type 2 diabetes. *JAMA* 2002;287(19):2542-51.
43. Rosen AB, Hamel MB, Weinstein MC, Cutler DM, Fendrick AM, Vijan S. Cost-effectiveness of full medicare coverage of angiotensin-converting enzyme inhibitors for beneficiaries with diabetes. *Ann Intern Med* 2005;143(2):89-99.
44. Chin MH, Drum ML, Jin L, Shook ME, Huang ES, Meltzer DO. Variation in treatment preferences and care goals among older patients with diabetes and their physicians. *Med Care* 2008;46(3):275-86.

# SUPPLEMENTARY DATA

**Supplementary Table 1. Cost-effectiveness analysis base case model assumptions**

| <b>Definition</b>                                           | <b>Base-Case Value</b>                                                                | <b>References</b>                                                             |
|-------------------------------------------------------------|---------------------------------------------------------------------------------------|-------------------------------------------------------------------------------|
| <b>Demographics</b>                                         |                                                                                       |                                                                               |
| Age at genetic testing                                      | 6                                                                                     | Pearson 2006 <sup>20</sup> , Stoy 2008 <sup>21</sup>                          |
| Proportion women                                            | 0.5                                                                                   | Pearson 2006 <sup>20</sup> , Stoy 2008 <sup>21</sup>                          |
| Proportion white                                            | 0.8                                                                                   | Chicago Neonatal Diabetes Registry                                            |
| <b>Clinical Characteristics</b>                             |                                                                                       |                                                                               |
| Probability of having a genetic defect                      | 0.416                                                                                 | Pearson 2006 <sup>20</sup> , Stoy 2008 <sup>21</sup>                          |
| Probability of conversion to sulfonyurea (<14 years of age) | 0.9                                                                                   | Pearson 2006 <sup>20</sup> , Stoy 2009                                        |
| Probability of conversion to sulfonyurea (>14 years of age) | 0.43                                                                                  | Chicago Neonatal Diabetes Registry                                            |
| Duration of diabetes, years                                 | 0.25                                                                                  | Pearson 2006 <sup>20</sup> , Stoy 2008 <sup>21</sup>                          |
| Blood pressure                                              | Non-diabetic values                                                                   | NHANES                                                                        |
| Cholesterol                                                 | Non-diabetic values                                                                   | NHANES; Wadwa 2005 <sup>22</sup>                                              |
| Body mass index                                             | Age-gender based values                                                               | CDC Growth Charts                                                             |
| Smoking                                                     | 0                                                                                     | Chicago Neonatal Diabetes Registry                                            |
| A1C % if successfully converted to sulfonylurea             | 6.4                                                                                   | Pearson 2006 <sup>20</sup> , Stoy 2008 <sup>21</sup>                          |
| A1C % if not successfully converted to sulfonylurea         | 8.1                                                                                   | Pearson 2006 <sup>20</sup> , Stoy 2008 <sup>21</sup>                          |
| <b>ANNUAL PROBABILITIES</b>                                 |                                                                                       |                                                                               |
| <b>Diabetic retinopathy progression</b>                     |                                                                                       |                                                                               |
| No retinopathy to background diabetic retinopathy (BDR)     | DCCT equation intensive glucose arm                                                   | Eastman 1997 <sup>23</sup>                                                    |
| BDR to Macular edema                                        | DCCT equation intensive glucose arm                                                   | Eastman 1997 <sup>23</sup>                                                    |
| BDR to Proliferative diabetic retinopathy (PDR)             | DCCT equation intensive glucose arm                                                   | Eastman 1997 <sup>23</sup>                                                    |
| Macular edema to blindness with photocoagulation            | 0.03                                                                                  | Vijan 2000 <sup>4</sup>                                                       |
| PDR to blindness with photocoagulation                      | 0.0148                                                                                | Javitt 1994 <sup>3</sup> , Vijan 2000 <sup>4</sup> , ETDRS 1991 <sup>24</sup> |
| <b>Diabetic nephropathy progression</b>                     |                                                                                       |                                                                               |
| Microalbuminuria                                            | DCCT equation intensive glucose arm                                                   | Eastman 1997 <sup>23</sup>                                                    |
| Microalbuminuria to Gross proteinuria                       | DCCT equation intensive glucose arm multiplied by 3 to obtain conditional probability | Eastman 1997 <sup>23</sup> , UKPDS 64 <sup>25</sup>                           |
| Gross proteinuria to end-stage renal disease                | 0.0042 (0-11 years)<br>0.0385 (12-24 years)<br>0.0740 (25 years+)                     | Humphrey 1989 <sup>5</sup>                                                    |
| <b>Diabetic neuropathy progression</b>                      |                                                                                       |                                                                               |

# SUPPLEMENTARY DATA

|                                                      |                                                                                                |                                                                                                                                                                  |
|------------------------------------------------------|------------------------------------------------------------------------------------------------|------------------------------------------------------------------------------------------------------------------------------------------------------------------|
| Diabetic neuropathy                                  | DCCT equation intensive glucose arm                                                            | Eastman 1997 <sup>23</sup>                                                                                                                                       |
| Neuropathy to foot ulcer                             | 0.0075, without neuropathy                                                                     | Young 1994 <sup>6</sup> , Gregg 2004 <sup>7</sup>                                                                                                                |
|                                                      | 0.0435, with neuropathy                                                                        |                                                                                                                                                                  |
| Foot ulcer to amputation                             | 0, no risk factors                                                                             | Peters 2001 <sup>8</sup>                                                                                                                                         |
|                                                      | 0, neuropathy                                                                                  |                                                                                                                                                                  |
|                                                      | 0.0067, neuropathy with foot deformity                                                         |                                                                                                                                                                  |
|                                                      | 0.095, history of foot ulcer                                                                   |                                                                                                                                                                  |
|                                                      |                                                                                                |                                                                                                                                                                  |
|                                                      |                                                                                                |                                                                                                                                                                  |
| <b>Cardiovascular complications</b>                  |                                                                                                |                                                                                                                                                                  |
| Ischemic heart disease                               | UKPDS equation                                                                                 | Clarke 2004 <sup>10</sup>                                                                                                                                        |
| Congestive heart failure                             | UKPDS equation                                                                                 | Clarke 2004 <sup>10</sup>                                                                                                                                        |
| Myocardial infarction                                | UKPDS equation                                                                                 | Clarke 2004 <sup>10</sup>                                                                                                                                        |
| Stroke                                               | UKPDS equation                                                                                 | Clarke 2004 <sup>10</sup>                                                                                                                                        |
|                                                      |                                                                                                |                                                                                                                                                                  |
|                                                      |                                                                                                |                                                                                                                                                                  |
| <b>Mortality</b>                                     |                                                                                                |                                                                                                                                                                  |
| First event mortality                                | UKPDS equation                                                                                 | Clarke 2004 <sup>10</sup>                                                                                                                                        |
| Diabetes mortality                                   | UKPDS equation                                                                                 | Clarke 2004 <sup>10</sup>                                                                                                                                        |
| Background mortality                                 | National Vital Statistics Life Tables ((non-cardiovascular death rate for non-diabetics)*2.75) | CDC, National Center for Health Statistics, 2004 <sup>15</sup> ; Patterson, 2007 <sup>17</sup> ; Skrivarhaug, 2006 <sup>18</sup> ; Dahlquist, 2005 <sup>19</sup> |
|                                                      |                                                                                                |                                                                                                                                                                  |
|                                                      |                                                                                                |                                                                                                                                                                  |
| <b>Diabetic ketoacidosis</b>                         |                                                                                                |                                                                                                                                                                  |
| Sulfonylurea                                         | 0.001                                                                                          | Chicago Neonatal Diabetes Registry                                                                                                                               |
| Insulin                                              | 0.051                                                                                          | Karges, 2010 <sup>26</sup>                                                                                                                                       |
|                                                      |                                                                                                |                                                                                                                                                                  |
| <b>Major hypoglycemic event requiring assistance</b> |                                                                                                |                                                                                                                                                                  |
| Sulfonylurea                                         | 0.001                                                                                          | Chicago Neonatal Diabetes Registry; Rafiq, 2008 <sup>27</sup> ; Clarke, 2009 <sup>12</sup>                                                                       |
| Insulin                                              | 1.15                                                                                           | Cryer, 2008 <sup>11</sup>                                                                                                                                        |
|                                                      |                                                                                                |                                                                                                                                                                  |
| <b>Other assumptions</b>                             |                                                                                                |                                                                                                                                                                  |
| Prevalence of foot deformity                         | 0.37                                                                                           | Rith-Najarian 1992 <sup>28</sup>                                                                                                                                 |
| Prevalence of peripheral vascular disease            | 0.15                                                                                           | Selvin, 2004 <sup>29</sup>                                                                                                                                       |
| Prevalence of atrial fibrillation                    | Gender and age specific prevalence from Kaiser population                                      | Go at al, 2001 <sup>30</sup>                                                                                                                                     |
|                                                      |                                                                                                |                                                                                                                                                                  |
| <b>TREATMENT COSTS</b>                               | <b>2008 Dollars</b>                                                                            |                                                                                                                                                                  |
|                                                      |                                                                                                |                                                                                                                                                                  |
| <b>Genetic testing and conversion</b>                |                                                                                                |                                                                                                                                                                  |
| Genetic testing of <i>KCNJ11/ABCC8</i>               | \$2,815                                                                                        | Athena Diagnostics, Inc. Price list                                                                                                                              |
| Transition to sulfonylurea costs                     | \$4,366                                                                                        | Chicago Neonatal Diabetes Registry                                                                                                                               |

# SUPPLEMENTARY DATA

|                                                   |                           |                                                      |
|---------------------------------------------------|---------------------------|------------------------------------------------------|
|                                                   |                           |                                                      |
| <b>Glucometer costs</b>                           |                           |                                                      |
| Lancet (each)                                     | \$0.07                    | Redbook 2009                                         |
| Annual lancet use on sulfonylurea                 | 6                         | Chicago Neonatal Diabetes Registry                   |
| Annual lancet use on insulin                      | 12                        | Chicago Neonatal Diabetes Registry                   |
| Strip (each)                                      | \$0.72                    | Redbook, 2009                                        |
| Annual strip use on sulfonylurea                  | 1095                      | Chicago Neonatal Diabetes Registry                   |
| Annual strip use on insulin                       | 2190                      | DCCT, 1993, 2000 <sup>31, 32</sup>                   |
| Minutes per Test Strip                            | 5                         | Expert opinion                                       |
|                                                   |                           |                                                      |
| <b>Pump and syringe costs</b>                     |                           |                                                      |
| Pump (annual)                                     | \$1,371.00                | Weintrob, 2003 <sup>33</sup>                         |
| Proportion pump                                   | 0.7                       | Chicago Neonatal Diabetes Registry                   |
| Multiple daily injections, syringe cost (annual)  | \$377.78                  | Redbook, 2009                                        |
| Syringe utilization per day                       | 4                         | Chicago Neonatal Diabetes Registry                   |
|                                                   |                           |                                                      |
| <b>Drug Costs</b>                                 |                           |                                                      |
| Insulin - Glargine (Lantus) - per unit            | \$0.10                    | Redbook, 2009                                        |
| Insulin Use (unit / kg / day)                     | 0.70                      | Chicago Neonatal Diabetes Registry                   |
| Sulfonylurea - Glyburide 1.25mg - per tablet      | \$0.12                    | Redbook, 2009                                        |
| Sulfonylurea - Glyburide 2.5mg - per tablet       | \$0.19                    | Redbook, 2009                                        |
| Sulfonylurea - Glyburide 5mg - per tablet         | \$0.28                    | Redbook, 2009                                        |
| Sulfonylurea Use                                  | 2-5 tablets 2-4 times/day | Pearson 2006 <sup>20</sup> , Stoy 2008 <sup>21</sup> |
|                                                   |                           |                                                      |
| Sulfonylurea Use (mg / kg / day)                  | 0.73                      | Chicago Neonatal Diabetes Registry                   |
| Year of age - switch from small to medium tablets | 10                        | Chicago Neonatal Diabetes Registry                   |
| Year of age - switch from medium to large tablets | 14                        | Chicago Neonatal Diabetes Registry                   |
|                                                   |                           |                                                      |
| <b>COMPLICATION COSTS (2008 Dollars)</b>          |                           |                                                      |
|                                                   |                           |                                                      |
| <b>Eye related costs</b>                          |                           |                                                      |
| Macular edema (event)                             | \$951.48                  | O'Brien 2003 <sup>34</sup>                           |
| Macular edema (state)                             | \$93.77                   | O'Brien 2003 <sup>34</sup>                           |
| Proliferative diabetic retinopathy (event)        | \$1,051.51                | O'Brien 2003 <sup>34</sup>                           |
| Proliferative diabetic retinopathy (state)        | \$93.77                   | O'Brien 2003 <sup>34</sup>                           |
| Blindness (state)                                 | \$4,608.63                | O'Brien 2003 <sup>34</sup>                           |
|                                                   |                           |                                                      |
| <b>Kidney related costs</b>                       |                           |                                                      |
| Microalbuminuria (event)                          | \$78.77                   | O'Brien 2003 <sup>34</sup>                           |
| Microalbuminuria (state)                          | \$18.75                   | O'Brien 2003 <sup>34</sup>                           |
| Proteinuria (event)                               | \$83.77                   | O'Brien 2003 <sup>34</sup>                           |
| Proteinuria (state)                               | \$27.51                   | O'Brien 2003 <sup>34</sup>                           |
| ESRD (state)                                      | \$46,288.89               | O'Brien 2003 <sup>34</sup>                           |

# SUPPLEMENTARY DATA

|                                                      |                                         |                                                           |
|------------------------------------------------------|-----------------------------------------|-----------------------------------------------------------|
|                                                      |                                         |                                                           |
| <b>Neuropathy related costs</b>                      |                                         |                                                           |
| Neuropathy (state)                                   | \$465.11                                | O'Brien 2003 <sup>34</sup>                                |
| Foot ulcer (event)                                   | \$11,313.44                             | Singh 2005 <sup>35</sup>                                  |
| Lower extremity amputation (event)                   | \$37,951.84                             | O'Brien 2003 <sup>34</sup>                                |
| Lower extremity amputation (state)                   | \$1,364.09                              | O'Brien 2003 <sup>34</sup>                                |
|                                                      |                                         |                                                           |
| <b>Cardiovascular complication costs</b>             |                                         |                                                           |
| Acute myocardial infarction (event)                  | \$37,964.35                             | O'Brien 2003 <sup>34</sup>                                |
| Acute myocardial infarction (state)                  | \$2,098.02                              | O'Brien 2003 <sup>34</sup>                                |
| Angina (event)                                       | \$7,531.85                              | O'Brien 2003 <sup>34</sup>                                |
| Angina (state)                                       | \$1,945.48                              | O'Brien 2003 <sup>34</sup>                                |
| Ischemic stroke (event)                              | \$50,273.63                             | O'Brien 2003 <sup>34</sup>                                |
| Ischemic stroke (event)                              | \$16,777.88                             | O'Brien 2003 <sup>34</sup>                                |
|                                                      |                                         |                                                           |
| <b>Diabetic ketoacidosis</b>                         | \$4,237                                 | Ellis, 2008 <sup>36</sup>                                 |
| <b>Major hypoglycemic event requiring assistance</b> | \$1,300.91                              | Bullano 2005 <sup>37</sup>                                |
|                                                      |                                         |                                                           |
|                                                      |                                         |                                                           |
| <b>INDIRECT COSTS</b>                                |                                         |                                                           |
|                                                      |                                         |                                                           |
| Caregiver time                                       | Age and sex specific median hourly wage | Bureau of Labor Statistics 2007                           |
| Caregiver - Gender                                   | Female                                  |                                                           |
| Caregiver - Age                                      | 40                                      |                                                           |
|                                                      |                                         |                                                           |
| <b>UTILITIES</b>                                     |                                         |                                                           |
| Blindness                                            | 0.69                                    | Dasbach, 1992 <sup>38</sup>                               |
| End-stage renal disease                              | 0.61                                    | DCCT, 1996 <sup>39</sup>                                  |
| Foot ulcer                                           | 0.75                                    | Redekop, 2004 <sup>40</sup> , Tennvall 2001 <sup>41</sup> |
| Lower extremity amputation                           | 0.68                                    | Redekop, 2004 <sup>40</sup>                               |
| Myocardial infarction or arrest                      | 0.88                                    | CDC, 2002 <sup>42</sup>                                   |
| Angina (Ischemic heart disease)                      | 0.97                                    | CDC, 2002 <sup>42</sup>                                   |
| Stroke                                               | 0.64                                    | Rosen, 2005 <sup>43</sup>                                 |
| Life with sulfonylurea                               | 0.96                                    | Chin, 2008 <sup>44</sup>                                  |
| Life with insulin                                    | 0.86                                    | Chin, 2008 <sup>44</sup>                                  |
|                                                      |                                         |                                                           |
| <b>DISCOUNT RATE</b>                                 | 0.03                                    |                                                           |
|                                                      |                                         |                                                           |



SUPPLEMENTARY DATA

**Supplementary Figure 1. Cost-Effectiveness of Genetic Testing by Prevalence of Treatable Genetic Defects.** Threshold analysis of the 30 year ICER (\$/QALY) for a range of hypothetical lower prevalences of sulfonylurea-treatable mutations in *KCNJ11* and *ABCC8*, with all other base case assumptions held constant.

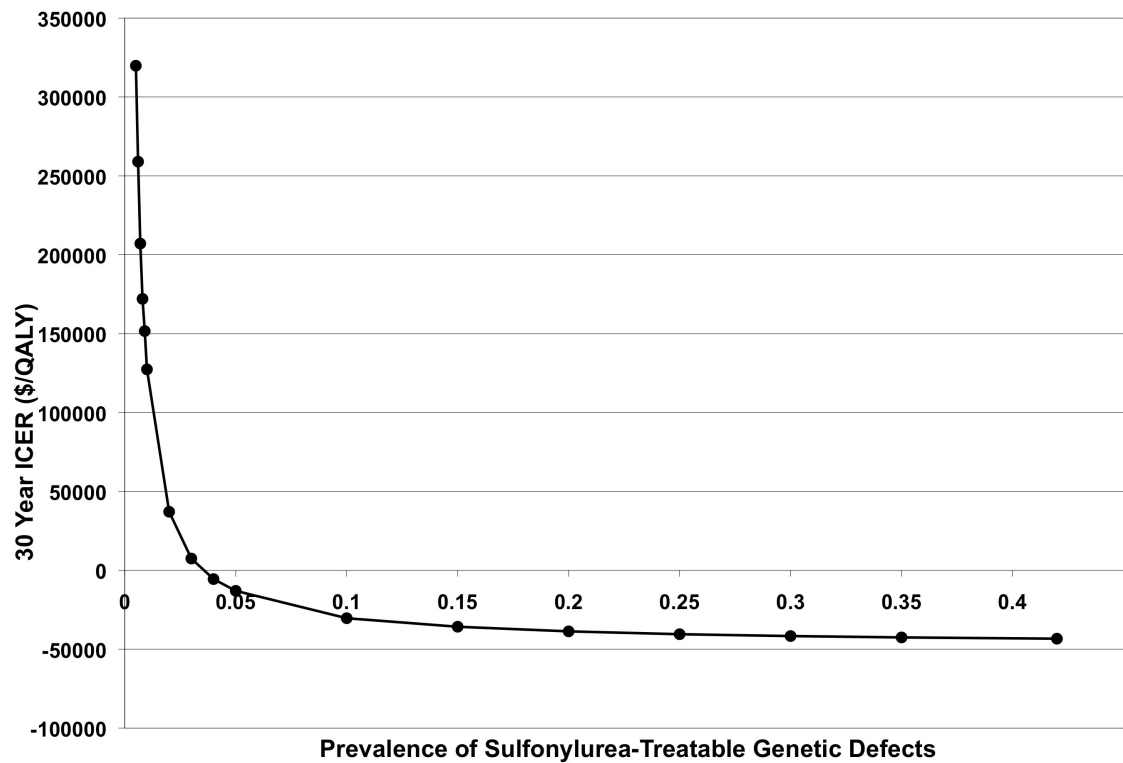

Supplement: dc101616supplementarydata.pdf [file dc101616supplementarydata.pdf]
